# Supplementary material for: BET Protein Inhibitor JQ1 Ameliorates Experimental Peritoneal Damage by Inhibition of Inflammation and Oxidative Stress
Source: MDPI journal article supplement (doi:10.3390/antiox12122055), 2023-11-29
Supplement: s1 [file s1]

**Supplementary Table S1. Demographic and clinical features of PD patients.**

| Patient | Sex | Age (years) | Cause of kidney failure | Diabetes | Hypertension | Months on PD | PD technique | Exchanges | Glucose (mg/dL) | Peritonitis | Hemoperitoneum | Escapes |
|---------|-----|-------------|-------------------------|----------|--------------|--------------|--------------|-----------|-----------------|-------------|----------------|---------|
| 1       | M   | 57          | T1DM                    | Yes      | Yes          | 56           | CCPD         | 20 L/24 h | 1815            | No          | No             | No      |
| 2       | M   | 77          | Unknown                 | No       | Yes          | 5            | CAPD         | 1         | 1360            | No          | No             | No      |
| 3       | F   | 65          | ADPKD                   | No       | Yes          | 11           | CAPD         | 1         | 2270            | No          | No             | No      |
| 4       | F   | 29          | Extracapillary FGN      | No       | Yes          | 3            | CAPD         | 1         | 2270            | No          | No             | No      |

M: male; F: female; T1DM: type 1 diabetes mellitus; ADPKD: autosomal dominant polycystic kidney disease; FGN: fibrillary glomerulonephritis; CCPD: Continuous cyclic peritoneal dialysis; CAPD: Continuous ambulatory peritoneal dialysis.

**Supplementary Table S2. Pre-designed assays used for qPCR.**

| <b>Specie</b> | <b>Gene</b>     | <b>Assay ID</b>     | <b>Company</b>              |
|---------------|-----------------|---------------------|-----------------------------|
| Mouse         | <i>Ccl2</i>     | Mm.PT.58.42151692   | Integrated DNA Technologies |
| Mouse         | <i>Ccl5</i>     | Mm.PT.58.43548565   | Integrated DNA Technologies |
| Mouse         | <i>Ccl8</i>     | Mm01297183_m1       | Applied Biosystems          |
| Mouse         | <i>Cxcl10</i>   | Mm.PT.58.43548565   | Integrated DNA Technologies |
| Mouse         | <i>Il1b</i>     | Mm.PT.58.41616450   | Integrated DNA Technologies |
| Mouse         | <i>Tnfa</i>     | Mm00443258_m1       | Applied Biosystems          |
| Mouse         | <i>Snai1</i>    | Mm00441533_g1       | Applied Biosystems          |
| Mouse         | <i>Cdh2</i>     | Mm.PT.58.12378183   | Integrated DNA Technologies |
| Mouse         | <i>Acta2</i>    | Mm.PT.58.16320644   | Integrated DNA Technologies |
| Mouse         | <i>Nox1</i>     | Mm.PT.58.29694286   | Integrated DNA Technologies |
| Mouse         | <i>Nox4</i>     | Mm.PT.58.8820983    | Integrated DNA Technologies |
| Mouse         | <i>Ppargc1a</i> | Mm.PT.58.16192665   | Integrated DNA Technologies |
| Mouse         | <i>Nfe2l2</i>   | Mm.PT.58.29108649   | Integrated DNA Technologies |
| Mouse         | <i>Cat</i>      | Mm.PT.58.12825133   | Integrated DNA Technologies |
| Mouse         | <i>Hmox1</i>    | Mm.PT.58.8600055    | Integrated DNA Technologies |
| Mouse         | <i>Sod1</i>     | Mm.PT.58.12368303   | Integrated DNA Technologies |
| Mouse         | <i>Sod2</i>     | Mm.PT.58.14276358   | Integrated DNA Technologies |
| Mouse         | <i>Gapdh</i>    | Mm99999915_g1       | Applied Biosystems          |
| Human         | <i>CCL2</i>     | Hs.PT.58.45467977   | Integrated DNA Technologies |
| Human         | <i>CCL5</i>     | Hs.PT.58.1724551    | Integrated DNA Technologies |
| Human         | <i>IL1B</i>     | Hs.PT.58.1518186    | Integrated DNA Technologies |
| Human         | <i>IL6</i>      | Hs.PT.58.40226675   | Integrated DNA Technologies |
| Human         | <i>SNAI1</i>    | Hs.PT.58.2984401    | Integrated DNA Technologies |
| Human         | <i>CDH2</i>     | Hs.PT.58.26024443   | Integrated DNA Technologies |
| Human         | <i>CCN2</i>     | Hs.PT.58.14485164.g | Integrated DNA Technologies |
| Human         | <i>VIM</i>      | Hs00185584_g1       | Applied Biosystems          |
| Human         | <i>FN1</i>      | Hs.PT.58.40005963   | Integrated DNA Technologies |
| Human         | <i>COL1A1</i>   | Hs.PT.58.15517795   | Integrated DNA Technologies |
| Human         | <i>ACTA2</i>    | Hs.PT.56a.2542642   | Integrated DNA Technologies |
| Human         | <i>NOX1</i>     | Hs.PT.58.381842     | Integrated DNA Technologies |
| Human         | <i>NOX4</i>     | Hs.PT.58.3866448    | Integrated DNA Technologies |
| Human         | <i>NFE2L2</i>   | Hs.PT.58.28159373   | Integrated DNA Technologies |
| Human         | <i>CAT</i>      | Hs.PT.56a.25069031  | Integrated DNA Technologies |
| Human         | <i>HMOX1</i>    | Hs.PT.58.45340055   | Integrated DNA Technologies |
| Human         | <i>SOD1</i>     | Hs.PT.58.20593019   | Integrated DNA Technologies |
| Human         | <i>SOD2</i>     | Hs.PT.58.25533008   | Integrated DNA Technologies |
| Human         | <i>GAPDH</i>    | Hs02786624_g1       | Applied Biosystems          |
